# Supplementary material for: The hole transporting behaviour of Cu2AgInS4 and Cu2AgInSe4 for a carbon electrode-based perovskite solar cell
Source: Royal Society of Chemistry journal article supplement (doi:10.1039/d0nj04175k), 2020-11-19
Supplement: d0nj04175k1.pdf [file d0nj04175k1.pdf]

## The hole transporting behaviour of $\text{Cu}_2\text{AgInS}_4$ and $\text{Cu}_2\text{AgInSe}_4$ for carbon electrode based perovskite solar cell

Pratheep Panneerselvam, Subramania Angaiah\*

*Electro-Materials Research Laboratory, Centre for Nanoscience and Technology,  
Pondicherry University, Puducherry-605 014, India.*

\*Corresponding Author E-mail: a.subramania@gmail.com

### Electronic supplementary information (ESI)

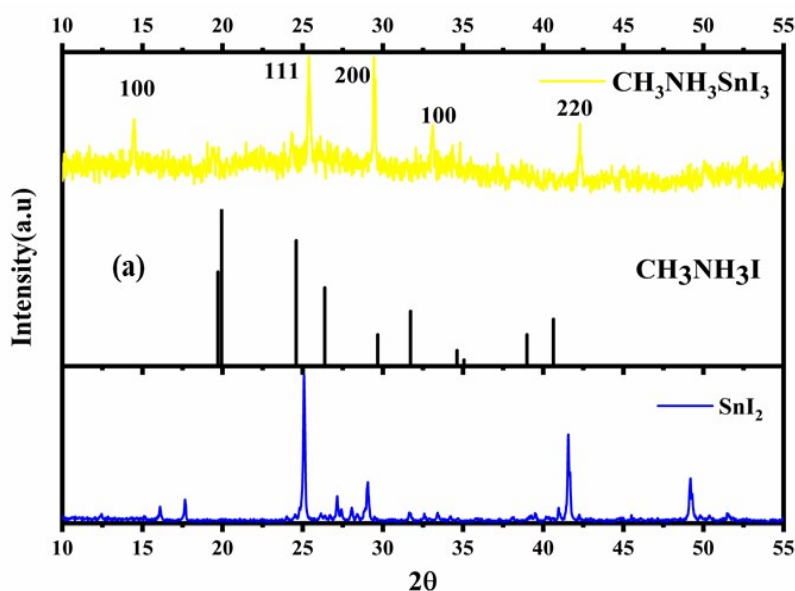

Fig.S1 XRD of  $\text{MASnI}_3$  perovskite

XRD pattern of the perovskite is shown in Fig. S1. The diffraction peak at  $14.46^\circ$ ,  $25.38^\circ$ ,  $29.44^\circ$ ,  $33.12^\circ$  and  $42.74^\circ$  correspond to (100), (111), (200), (012) and (220) planes of the tetragonal perovskite phase with a space group of  $P4mm$ . It clearly indicates that there is no other peaks of MAI,  $\text{SnI}_2$  and  $\text{SnO}$ .

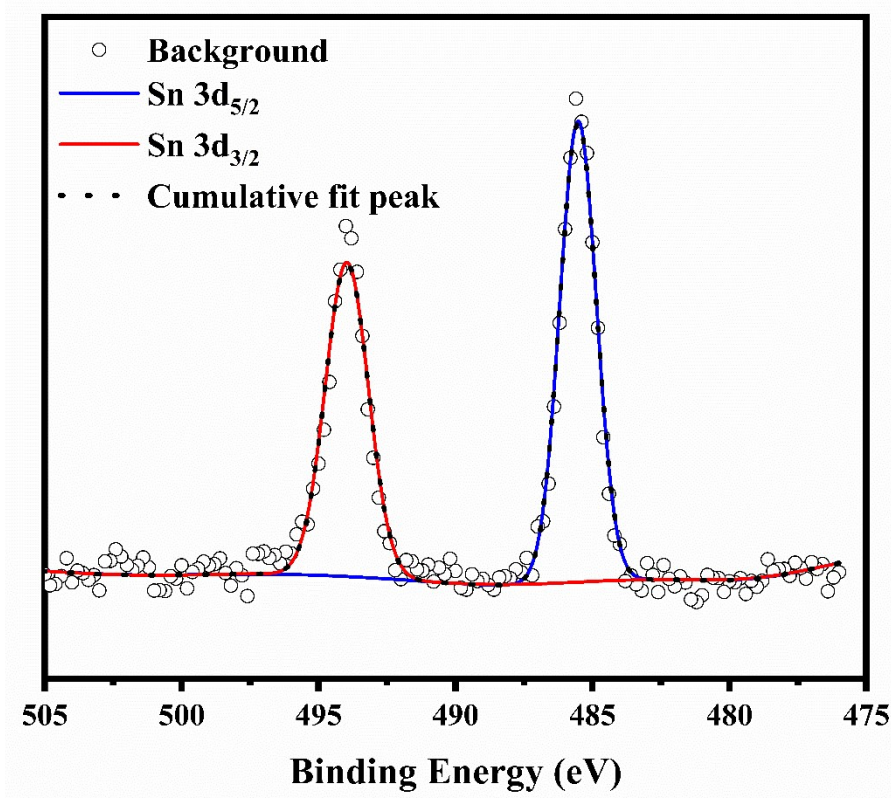

**Fig.S2 HR-XPS of Sn element present in the MASnI<sub>3</sub> perovskite**

The Sn3d<sub>5/2</sub> peak (Fig. S2) showed almost exclusively one type of Sn. The main band at 486 eV can be assigned to Sn<sup>2+</sup> indicating pure Sn<sup>2+</sup> (as Sn<sup>4+</sup> would be expected at 488 eV and Sn<sup>0</sup> at 484.0 eV). These above results show the pure form of MASnI<sub>3</sub> perovskite and free from other impurities<sup>1-3</sup>.

1. Y. Dang, Y. Zhou, X. Liu, D. Ju, S. Xia, H. Xia and X. Tao, *Angew. Chem. Int. Ed. Engl.*, 2016, **55**, 3447-3450.
2. M. Weiss, J. Horn, C. Richter and D. Schlettwein, *physica status solidi (a)*, 2016, **213**, 975-981.
3. C. Mortan, T. Hellmann, O. Clemens, T. Mayer and W. Jaegermann, *physica status solidi (a)*, 2019, **216**.
